# Supplementary material
Source: publisher figshare collection journal article supplement (https://sage.figshare.com/ndownloader/files/13612436)
Supplement: Supplementary file 1 [file 13612436]

| No. | Sample tissue | Reference tissue | Chr | Cytogenetic Location | Start | Stop | Size (Mb) | # Probes | Gain/Loss |
| --- | --- | --- | --- | --- | --- | --- | --- | --- | --- |
| 1 | Cardiac muscle | Amnion | 4 | q13.2 | 70216706 | 70294386 | 0.078 | 5 | Loss |
| 2 | Amnion | Spleen | 4 | q13.2 | 70183174 | 70264747 | 0.082 | 5 | Gain |
| 3 | Skin surface | Thymus | 7 | p14.1 | 38290457 | 38336041 | 0.046 | 4 | Gain |
| 4 | Thymus | Lung | 7 | p14.1 | 38290457 | 38336041 | 0.046 | 4 | Loss |
| 5 | Skin surface | Thymus | 7 | q34 | 141791795 | 142197140 | 0.405 | 44 | Gain |
| 6 | Thymus | Lung | 7 | q34 | 141872841 | 142197140 | 0.324 | 40 | Loss |
| 7 | Skeletal muscle | Cerebellum | 8 | p11.23 | 39403769 | 39482072 | 0.078 | 4 | Gain |
| 8 | Cerebellum | Stomach | 8 | p11.23 | 39353287 | 39482072 | 0.129 | 7 | Gain |
| 9 | Stomach | Skin surface | 8 | p11.23 | 39353287 | 39482072 | 0.129 | 7 | Loss |
| 10 | Lung | Cardiac muscle | 8 | p11.23 | 39353287 | 39482072 | 0.129 | 7 | Loss |
| 11 | Amnion | Spleen | 8 | p11.23 | 39368506 | 39482072 | 0.114 | 6 | Gain |
| 12 | Gonad | Colon | 8 | p11.23 | 39353287 | 39482072 | 0.129 | 7 | Loss |
| 13 | Kidney | Pancreas | 8 | p11.23 | 39353287 | 39482072 | 0.129 | 7 | Loss |
| 14 | Cartilage | Small intestine | 8 | p11.23 | 39353287 | 39482072 | 0.129 | 7 | Gain |
| 15 | Chorionic villi | Gonad | 8 | p11.23 | 39353287 | 39482072 | 0.129 | 7 | Gain |
| 16 | Gonad | Colon | 11 | q11 | 55136664 | 55207471 | 0.071 | 4 | Gain |
| 17 | Colon | Kidney | 11 | q11 | 55142200 | 55207471 | 0.065 | 3 | Loss |
| 18 | Skin surface | Thymus | 14 | q11.2 | 21863210 | 22000569 | 0.137 | 8 | Gain |
| 19 | Thymus | Lung | 14 | q11.2 | 21863210 | 22000569 | 0.137 | 8 | Gain |
| 20 | Cardiac muscle | Amnion | 15 | q11.2 | 18810004 | 18872880 | 0.063 | 24 | Gain |
| 21 | Amnion | Spleen | 15 | q11.1-q11.2 | 18261165 | 19534662 | 1.273 | 390 | Loss |
| 22 | Cardiac muscle | Amnion | 15 | q11.2 | 19916779 | 20297653 | 0.381 | 79 | Gain |
| 23 | Amnion | Spleen | 15 | q11.2 | 19871277 | 20082731 | 0.211 | 89 | Loss |

Supplementary Table 2. Highly confident validated CNVS of fetus 2. The mentioned locations are based on *build hg18* of the human genome UCSC Genome Browser.
